# Supplementary material for: Hybrid host materials for highly efficient electrophosphorescence and thermally activated delayed fluorescence independent of the linkage mode
Source: Royal Society of Chemistry journal article supplement (doi:10.1039/c6cp08334j), 2017-01-01
Supplement: c6cp08334j1.pdf [file c6cp08334j1.pdf]

Supplementary Information

**Hybrid host materials for highly efficient electrophosphorescence and thermally activated delayed fluorescence independent of the linkage mode**

Chao Wu,<sup>‡a</sup> Qingxun Guo,<sup>‡b</sup> Wujun Ma,<sup>a</sup> Xiaoping Li,<sup>c</sup> Panlong Qiu,<sup>a</sup> Jianyong Hu,<sup>a</sup> Qiang Wang,<sup>\*a</sup> Jiangshan Chen<sup>bd</sup> and Dongge Ma<sup>\*bd</sup>

<sup>a</sup> Shaanxi Key Laboratory for Advanced Energy Devices, School of Materials Science and Engineering, Shaanxi Normal University, Xi'an 710119, P. R. China

<sup>b</sup> State Key Laboratory of Polymer Physics and Chemistry, Changchun Institute of Applied Chemistry, University of Chinese Academy of Sciences, Changchun 130022, P. R. China

<sup>c</sup> College of Chemistry and Chemical Engineering, Qufu Normal University, Qufu 273165, P. R. China

<sup>d</sup> Institute of Polymer Optoelectronic Materials and Devices, State Key Laboratory of Luminescent Materials and Devices, South China University of Technology, Guangzhou 510640, P. R. China

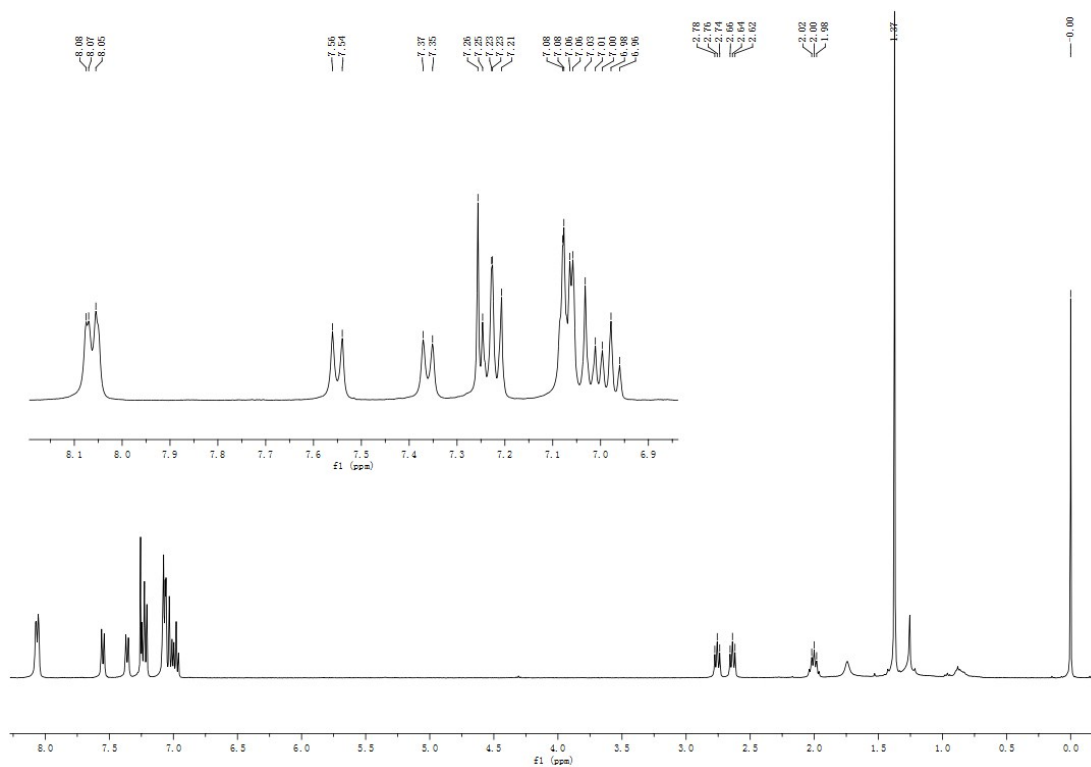

**Fig. S1**  $^1\text{H}$  NMR spectrum of *t*Bu-OXD-*o*-L-TPA in  $\text{CDCl}_3$ .

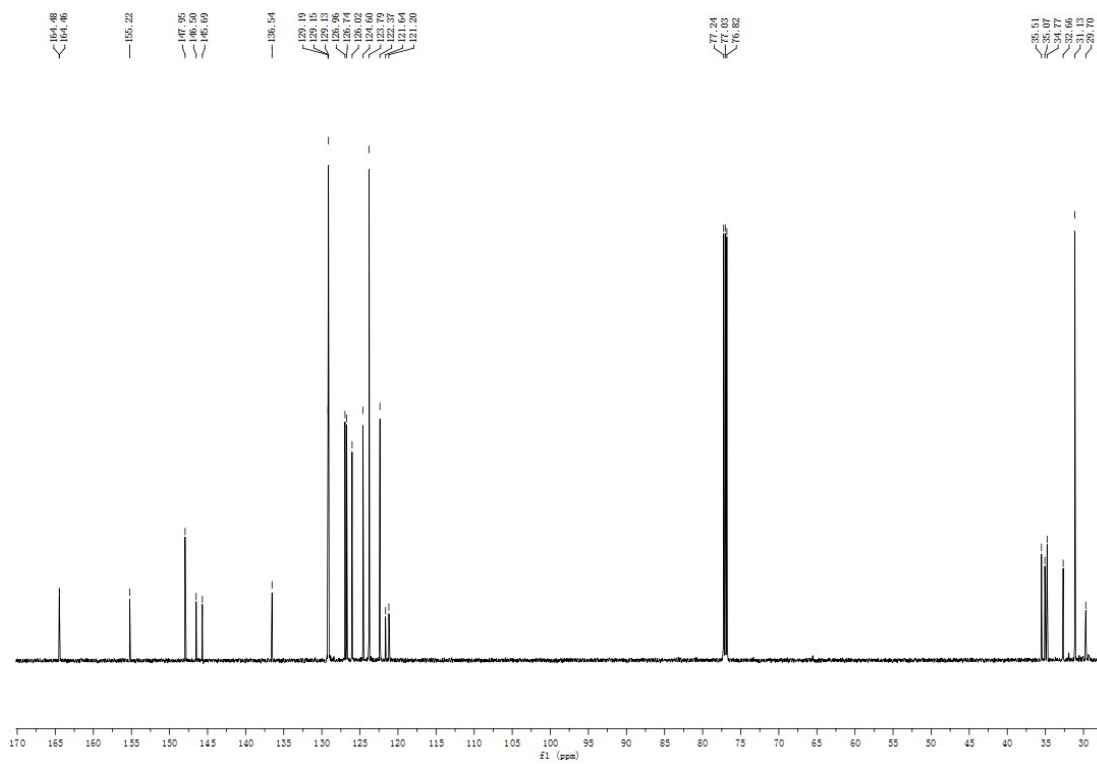

**Fig. S2**  $^{13}\text{C}$  NMR spectrum of *t*Bu-OXD-*o*-L-TPA in  $\text{CDCl}_3$ .

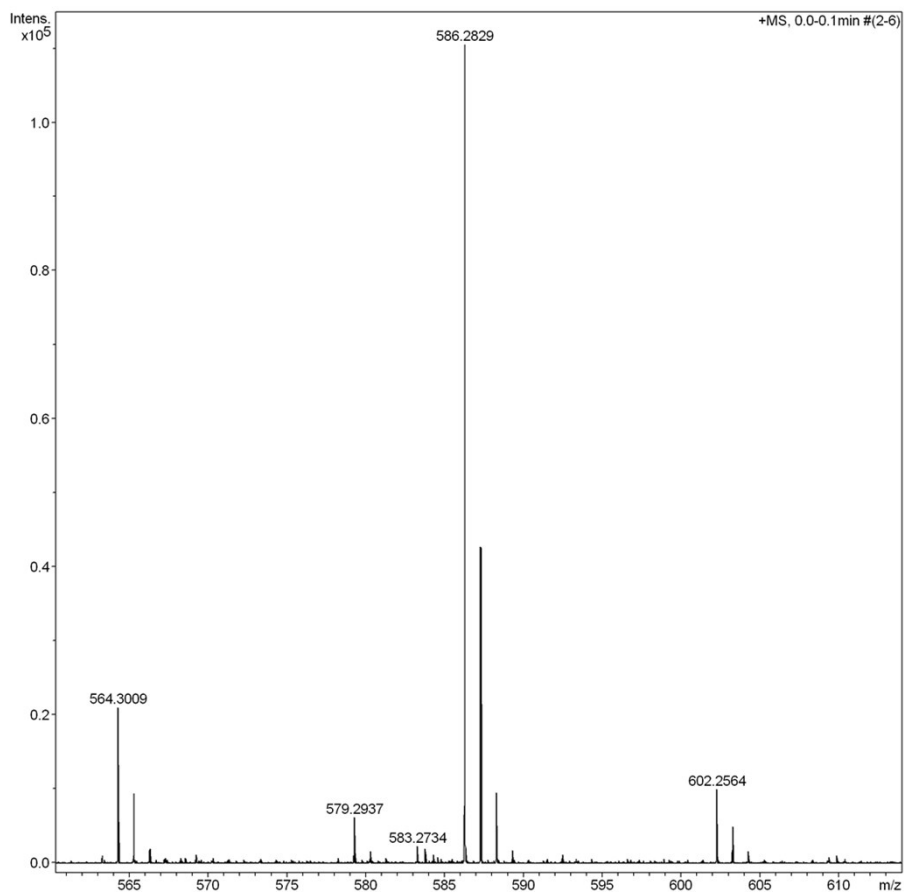

**Fig. S3** HRMS spectrum of *t*Bu-OXD-*o*-L-TPA.

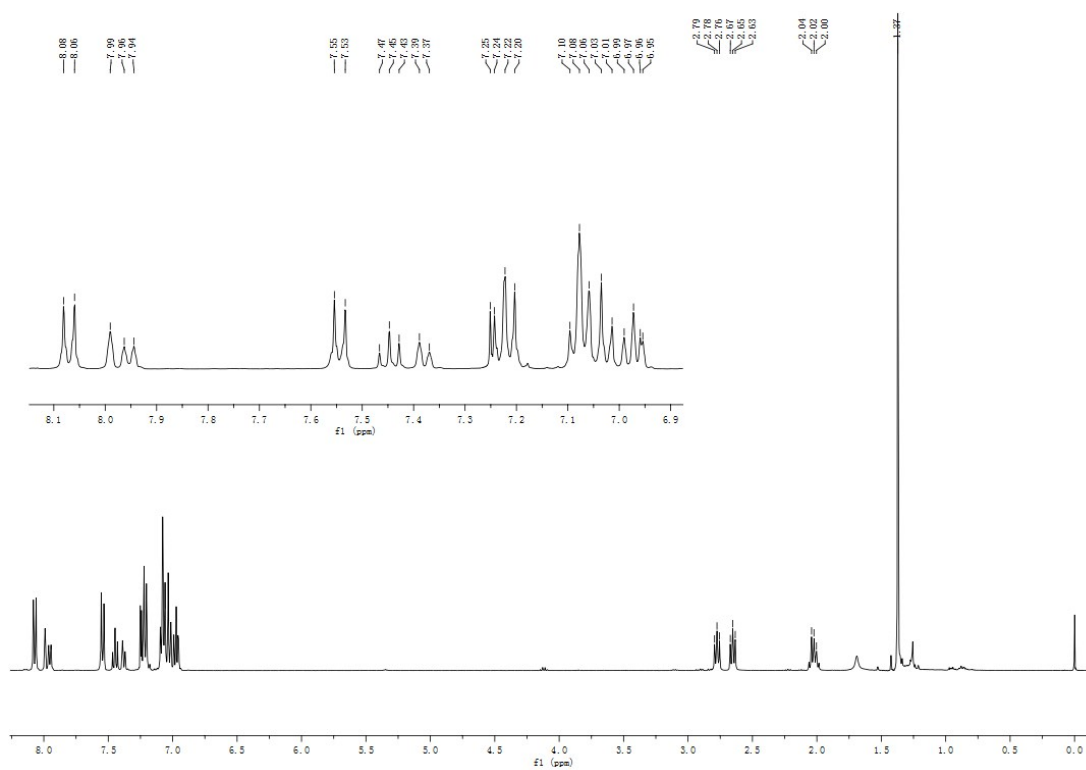

**Fig. S4**  $^1\text{H}$  NMR spectrum of *t*Bu-OXD-*m*-L-TPA in  $\text{CDCl}_3$ .

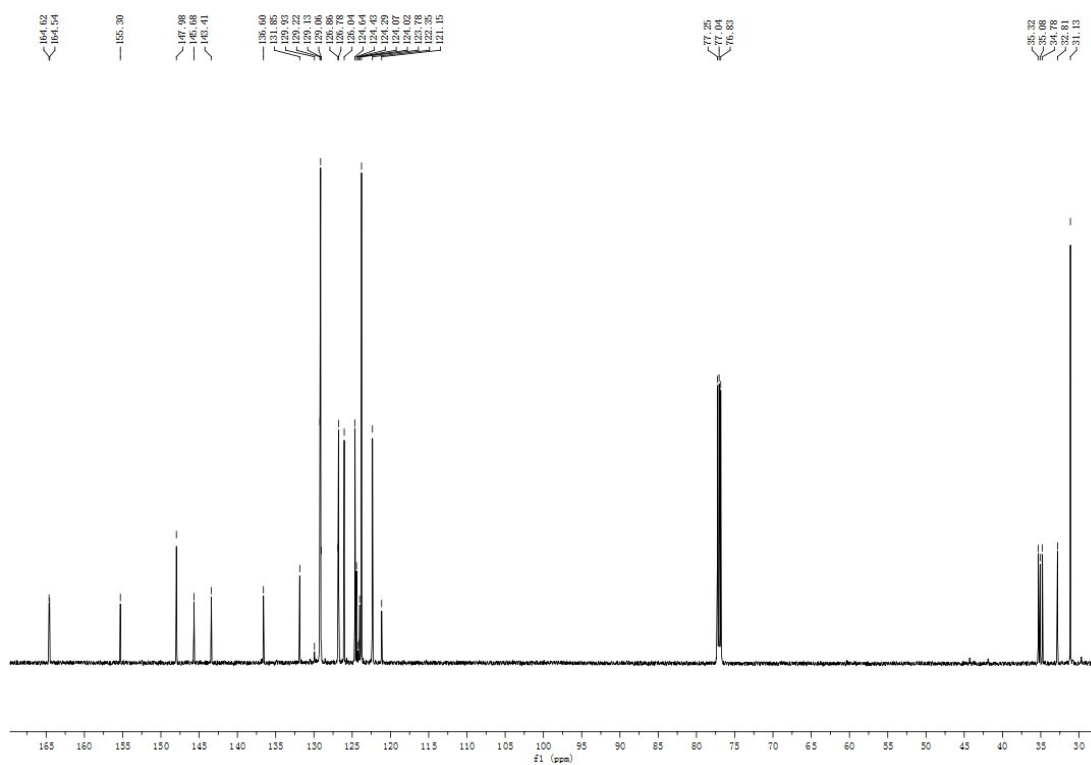

Fig. S5  $^{13}\text{C}$  NMR spectrum of *t*Bu-OXD-*m*-L-TPA in  $\text{CDCl}_3$ .

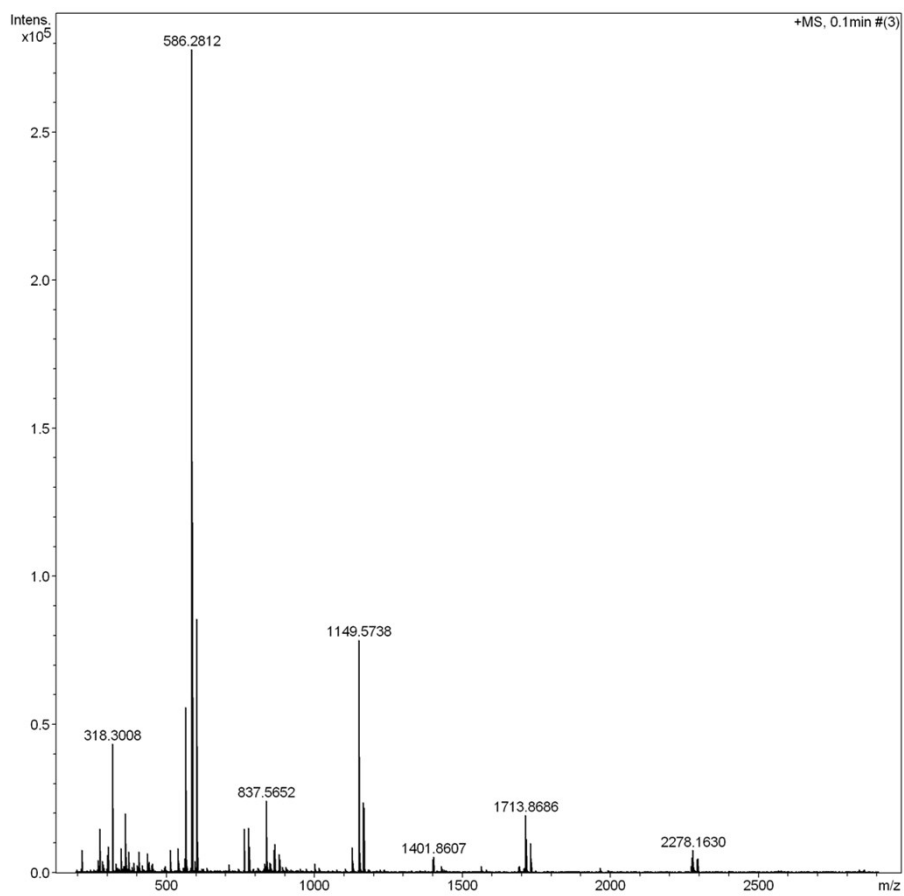

Fig. S6 HRMS spectrum of *t*Bu-OXD-*m*-L-TPA.

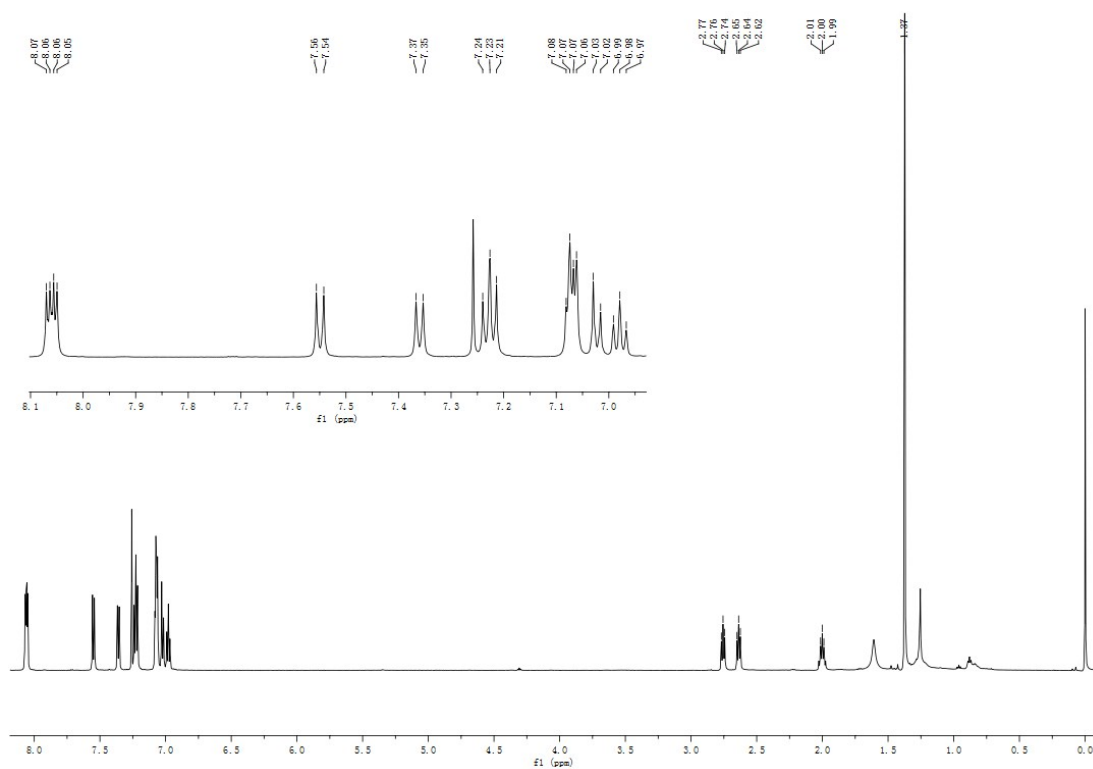

**Fig. S7**  $^1\text{H}$  NMR spectrum of *t*Bu-OXD-*p*-L-TPA in  $\text{CDCl}_3$ .

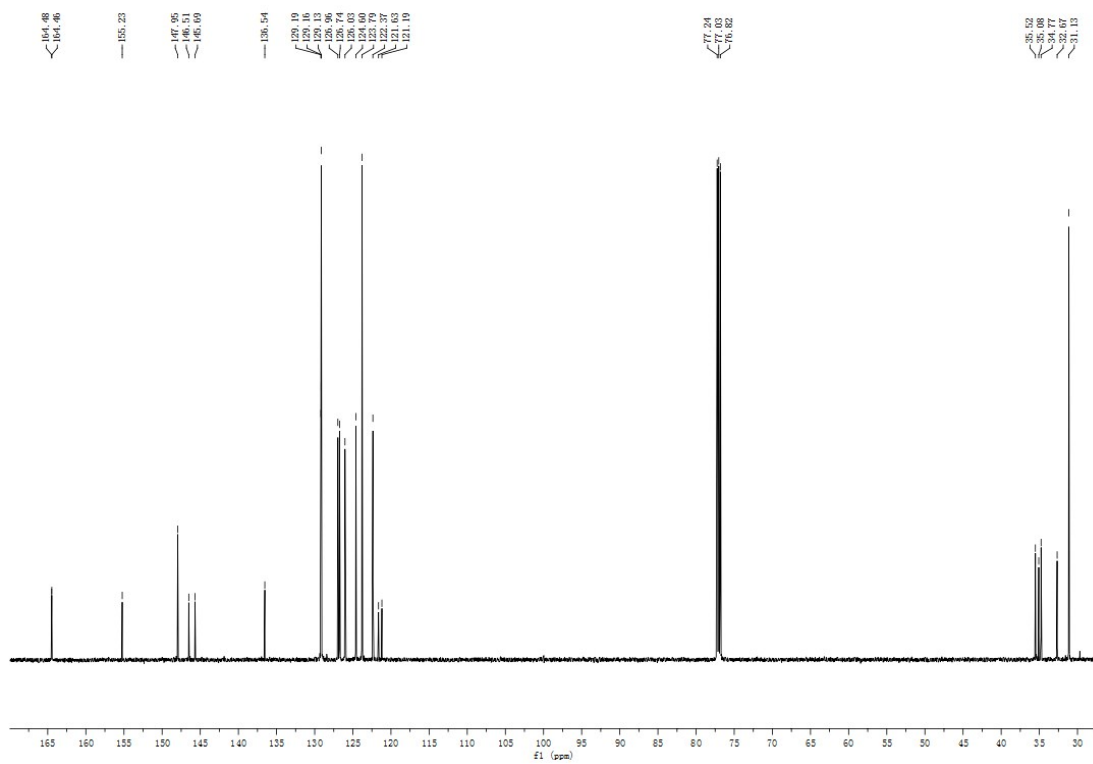

**Fig. S8**  $^{13}\text{C}$  NMR spectrum of *t*Bu-OXD-*p*-L-TPA in  $\text{CDCl}_3$ .

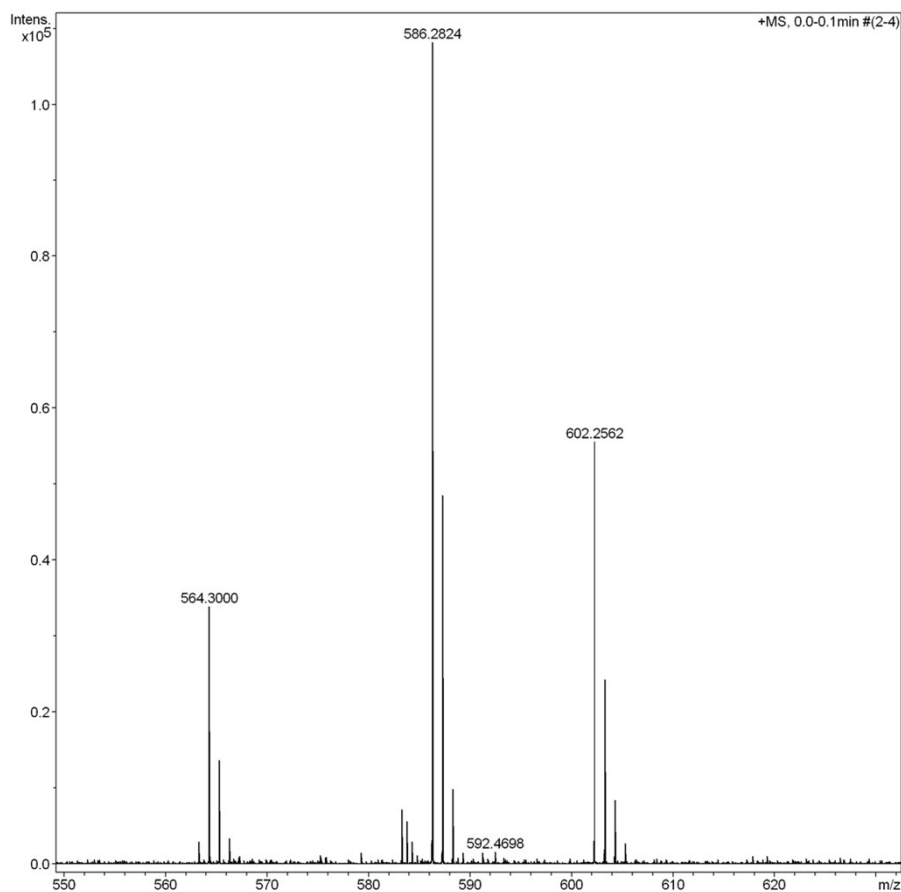

**Fig. S9** HRMS spectrum of *t*Bu-OXD-*p*-L-TPA.

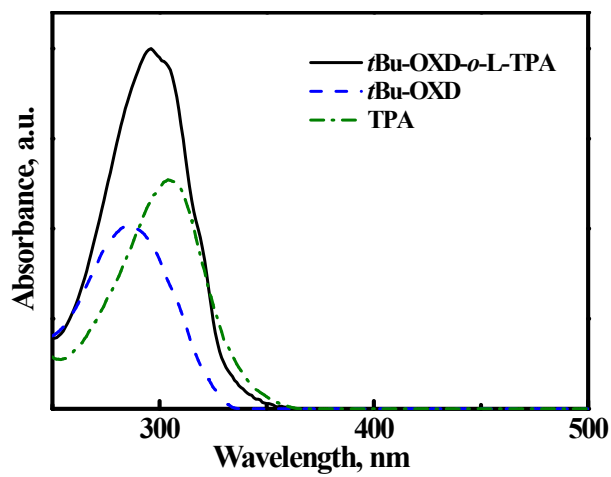

**Fig. S10** UV-Vis absorption spectra of *t*Bu-OXD-*o*-L-TPA, *t*Bu-OXD, and TPA in dilute CH<sub>2</sub>Cl<sub>2</sub> solutions.

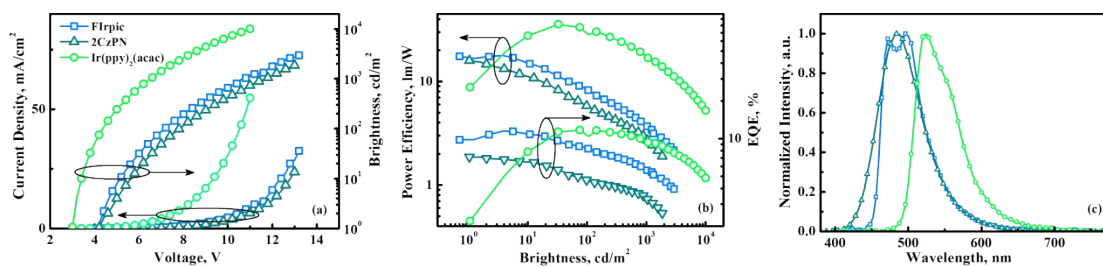

**Fig. S11** (a) Current density-voltage-luminance ( $J$ - $V$ - $L$ ) characteristics, (b) external quantum efficiency and power efficiency *versus* luminance characteristics, and (c) the normalized EL spectra for TADF blue, phosphorescent blue and green OLEDs based on *t*Bu-OXD-*m*-L-TPA.
